# Supplementary material for: Electromigration separation of lithium isotopes with B12C4, B15C5 and B18C6 systems
Source: Royal Society of Chemistry journal article supplement (doi:10.1039/d3nj05963d), 2024-01-01
Supplement: d3nj05963d1.pdf [file d3nj05963d1.pdf]

## Electromigration separation of lithium isotopes with B12C4, B15C5 and B18C6 systems

Zhiyu Zhao, Xiaolong Zhou, Qingfen Meng, Pengrui Zhang, Fei Shao, Xiao Li,  
Huangda Li, Lianjing Mao, Tianyu Zheng, Yan Jing, Yongzhong Jia, Shuxuan Wang,  
Jinhe Sun

*New Journal of Chemistry*

### 3.1 The effect of crown ethers with different lithium salts

**Table S1.** The  $\alpha$  and  $\delta^7\text{Li}$  value of B12C4 system.

| lithium salts      | $\delta^7\text{Li}_A$ | $\delta^7\text{Li}_O$ | $\delta^7\text{Li}_C$ | $\alpha(\text{C}/\text{A})$ | $\alpha(\text{O}/\text{A})$ | $\alpha(\text{C}/\text{O})$ |
|--------------------|-----------------------|-----------------------|-----------------------|-----------------------------|-----------------------------|-----------------------------|
| LiCl               | 15.403                | -4.798                | -11.956               | 1.028                       | 1.020                       | 1.007                       |
| LiNTf <sub>2</sub> | 2.408                 | -11.614               | -17.558               | 1.020                       | 1.014                       | 1.006                       |

where subscript “A”, “O” and “C” represent anolyte, organic solution and catholyte respectively.

**Table S2.** The  $\alpha$  and  $\delta^7\text{Li}$  value of B15C5 system.

| lithium salts      | $\delta^7\text{Li}_A$ | $\delta^7\text{Li}_O$ | $\delta^7\text{Li}_C$ | $\alpha(\text{C}/\text{A})$ | $\alpha(\text{O}/\text{A})$ | $\alpha(\text{C}/\text{O})$ |
|--------------------|-----------------------|-----------------------|-----------------------|-----------------------------|-----------------------------|-----------------------------|
| LiCl               | 15.647                | -0.640                | -8.583                | 1.024                       | 1.016                       | 1.008                       |
| LiNTf <sub>2</sub> | 3.040                 | -17.684               | -24.982               | 1.029                       | 1.021                       | 1.007                       |

where subscript “A”, “O” and “C” represent anolyte, organic solution and catholyte respectively.

**Table S3.** The  $\alpha$  and  $\delta^7\text{Li}$  value of B18C6 system.

| lithium salts      | $\delta^7\text{Li}_A$ | $\delta^7\text{Li}_O$ | $\delta^7\text{Li}_C$ | $\alpha(\text{C}/\text{A})$ | $\alpha(\text{O}/\text{A})$ | $\alpha(\text{C}/\text{O})$ |
|--------------------|-----------------------|-----------------------|-----------------------|-----------------------------|-----------------------------|-----------------------------|
| LiCl               | 15.183                | 8.0129                | 4.258                 | 1.011                       | 1.007                       | 1.004                       |
| LiNTf <sub>2</sub> | 2.351                 | -6.245                | -8.664                | 1.011                       | 1.009                       | 1.002                       |

where subscript “A”, “O” and “C” represent anolyte, organic solution and catholyte respectively.

### 3.2 The effect of crown ethers under different electric field

**Table S4.** The  $\alpha$  and  $\delta^7\text{Li}$  value of B12C4 system.

| voltage | $\delta^7\text{Li}_A$ | $\delta^7\text{Li}_O$ | $\delta^7\text{Li}_C$ | $\alpha(\text{C}/\text{A})$ | $\alpha(\text{O}/\text{A})$ | $\alpha(\text{C}/\text{O})$ |
|---------|-----------------------|-----------------------|-----------------------|-----------------------------|-----------------------------|-----------------------------|
| 2 V     | 7.294                 | -12.301               | -10.513               | 1.018                       | 1.020                       | 0.998                       |
| 6 V     | 7.437                 | -9.610                | -1.221                | 1.009                       | 1.017                       | 0.992                       |
| 12 V    | 7.927                 | -9.817                | -13.100               | 1.021                       | 1.018                       | 1.003                       |
| 16 V    | 15.043                | -4.798                | -11.956               | 1.028                       | 1.020                       | 1.007                       |

where subscript “A”, “O” and “C” represent anolyte, organic solution and catholyte respectively.

**Table S5.** The  $\alpha$  and  $\delta^7\text{Li}$  value of B15C5 system.

| voltage | $\delta^7\text{Li}_A$ | $\delta^7\text{Li}_O$ | $\delta^7\text{Li}_C$ | $\alpha(\text{C}/\text{A})$ | $\alpha(\text{O}/\text{A})$ | $\alpha(\text{C}/\text{O})$ |
|---------|-----------------------|-----------------------|-----------------------|-----------------------------|-----------------------------|-----------------------------|
| 2 V     | 13.614                | -10.097               | 9.214                 | 1.004                       | 1.024                       | 0.981                       |
| 6 V     | 7.615                 | -8.311                | -10.424               | 1.016                       | 1.014                       | 1.002                       |
| 12 V    | 7.893                 | -5.409                | -11.337               | 1.022                       | 1.016                       | 1.006                       |
| 16 V    | 15.647                | -0.640                | -8.583                | 1.024                       | 1.016                       | 1.008                       |

where subscript “A”, “O” and “C” represent anolyte, organic solution and catholyte respectively.

**Table S6.** The  $\alpha$  and  $\delta^7\text{Li}$  value of B18C6 system.

| voltage | $\delta^7\text{Li}_A$ | $\delta^7\text{Li}_O$ | $\delta^7\text{Li}_C$ | $\alpha(\text{C}/\text{A})$ | $\alpha(\text{O}/\text{A})$ | $\alpha(\text{C}/\text{O})$ |
|---------|-----------------------|-----------------------|-----------------------|-----------------------------|-----------------------------|-----------------------------|
| 2 V     | 14.488                | 6.700                 | 6.455                 | 1.008                       | 1.008                       | 1.000                       |
| 6 V     | 14.704                | 5.565                 | 4.574                 | 1.010                       | 1.009                       | 1.001                       |
| 12 V    | 14.955                | 5.438                 | 3.626                 | 1.011                       | 1.009                       | 1.002                       |
| 16 V    | 15.183                | 8.0129                | 4.258                 | 1.011                       | 1.007                       | 1.004                       |

where subscript “A”, “O” and “C” represent anolyte, organic solution and catholyte respectively.
